# Supplementary material
Source: publisher figshare collection journal article supplement (https://gsajournals.figshare.com/articles/dataset/_/7077146)
Supplement: Supplementary file 1 [file 1]

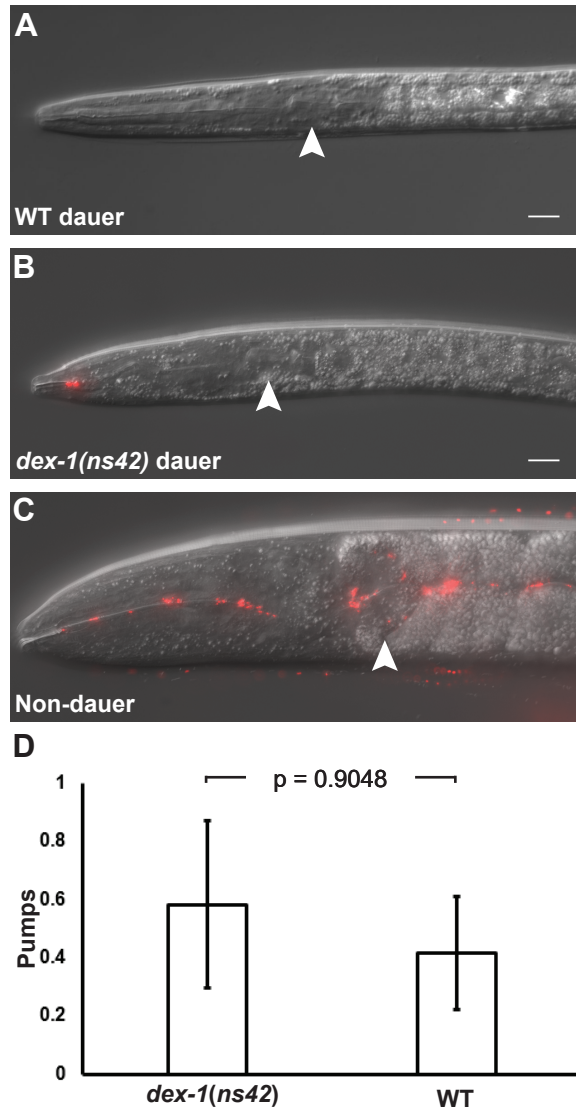

**Figure S2. *dex-1(ns42)* dauers have defects in buccal plug formation.** Dorsoventral view of a wild-type dauer (A) and lateral views of a *dex-1(ns42)* dauer (B) and non-dauer L3 (C) following a fluorescent bead feeding assay. We did not observe fluorescence in the intestines of wild-type (A) or *dex-1(ns42)* mutant (B) dauers. However, fluorescence was occasionally observed in the buccal cavity of *dex-1(ns42)* dauers (B). (C) Fluorescent beads were observed throughout the digestive tract of non-dauer animals. Arrowheads point to the terminal bulb. Scale bar, 10 $\mu$ m. (D) Pharyngeal pumping is effectively suppressed in *dex-1(ns42)* dauers over a two minute observation period. Error bars, SEM. n = 12.
