# Supplementary material
Source: publisher figshare collection journal article supplement (https://gsajournals.figshare.com/articles/dataset/_/7077146)
Supplement: Supplementary file 2 [file 1]

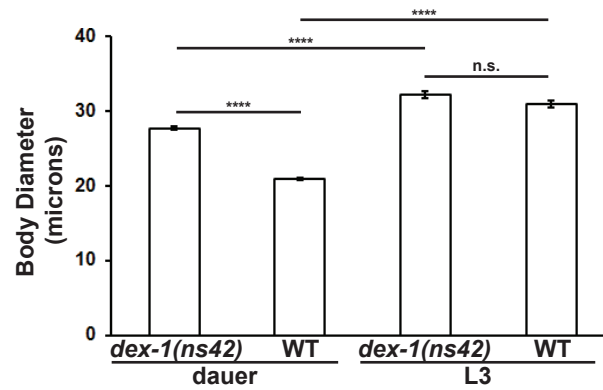

**Figure S1. The phenotypes observed in *dex-1* mutants are dauer-specific.** *dex-1(ns42)* dauers are defective for radial shrinkage and have a larger body diameter than wild-type dauers. However, *dex-1(ns42)* non-dauer L3 animals are not significantly larger than wild-type L3s. Error bars, SEM. (n=20,  $\alpha = 0.05$ , p-value indicated by \*\*\*\*<0.0001, n.s.=not significant.)
