# Supplementary material
Source: publisher figshare collection journal article supplement (https://gsajournals.figshare.com/articles/dataset/_/7077146)
Supplement: Supplementary file 3 [file 1]

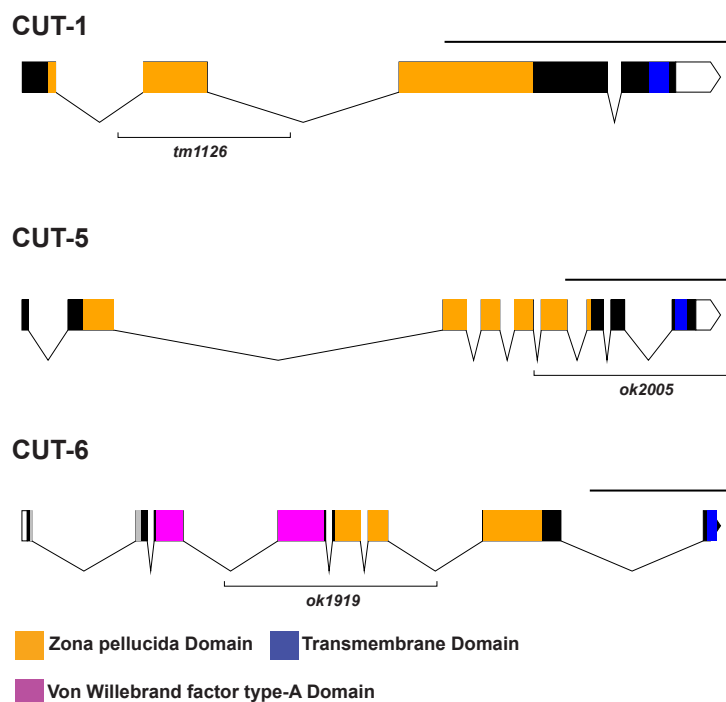

**Figure S7. Gene schematics of cuticlins.** CUT proteins share similar domains. CUT-1, CUT-5 and CUT-6 all contain zona pellucida domains and C-terminal transmembrane domains. CUT-6 alone also contains a Von Willebrand factor type-A domain near its N-terminal. The deletion mutations *cut-1(tm1126)*, *cut-5(ok2005)*, and *cut-6(ok1919)* all truncate parts of their respective ZP domains, likely resulting in functional nulls. The *cut-5(ok2005)* deletion extends 453 bases past the stop codon. Scale bars, 1kb.
