# Supplementary material
Source: publisher figshare collection journal article supplement (https://gsajournals.figshare.com/articles/dataset/_/7077146)
Supplement: Supplementary file 4 [file 1]

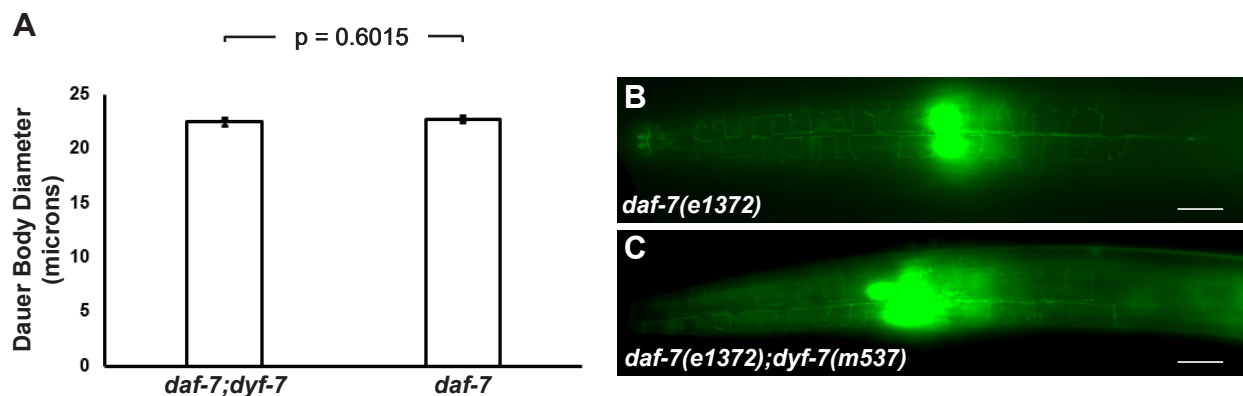

**Figure S5. *dyf-7(m537)* dauers are wild-type for dauer-specific radial constriction and IL2 remodeling.** (A) *daf-7(e1372);dyf-7(m537)* dauers undergo radial constriction similar to *daf-7(e1372)* dauers. Error bars, SEM. n = 15. (B and C) We observed no apparent defects in IL2 remodeling between (B) *daf-7(e1372)* and (C) *daf-7(e1372);dyf-7(m537)* dauers. Scale bar, 10 $\mu$ m.
