# Supplementary material
Source: publisher figshare collection journal article supplement (https://gsajournals.figshare.com/articles/dataset/_/7077146)
Supplement: Supplementary file 5 [file 1]

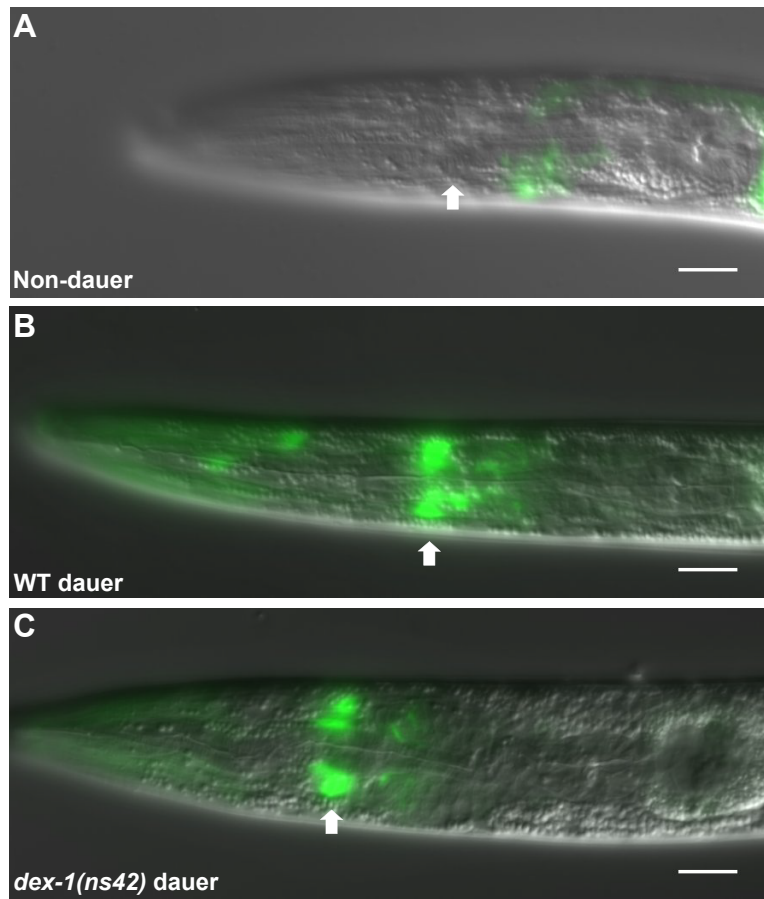

**Figure S3. *dex-1(ns42)* dauers exhibit dauer specific expression of *lag-2p::gfp* in the IL2 neurons.** Expression of *lag-2p::gfp* in the IL2 neurons is specific to the dauer stage. *lag-2p::gfp* is absent in non-dauer IL2 cell bodies (A) (arrow) but is expressed brightly in both wild-type (B) and *dex-1(ns42)* (C) dauers (arrows). Scale bar, 10µm.
