# Supplementary material
Source: publisher figshare collection journal article supplement (https://gsajournals.figshare.com/articles/dataset/_/7077146)
Supplement: Supplementary file 6 [file 1]

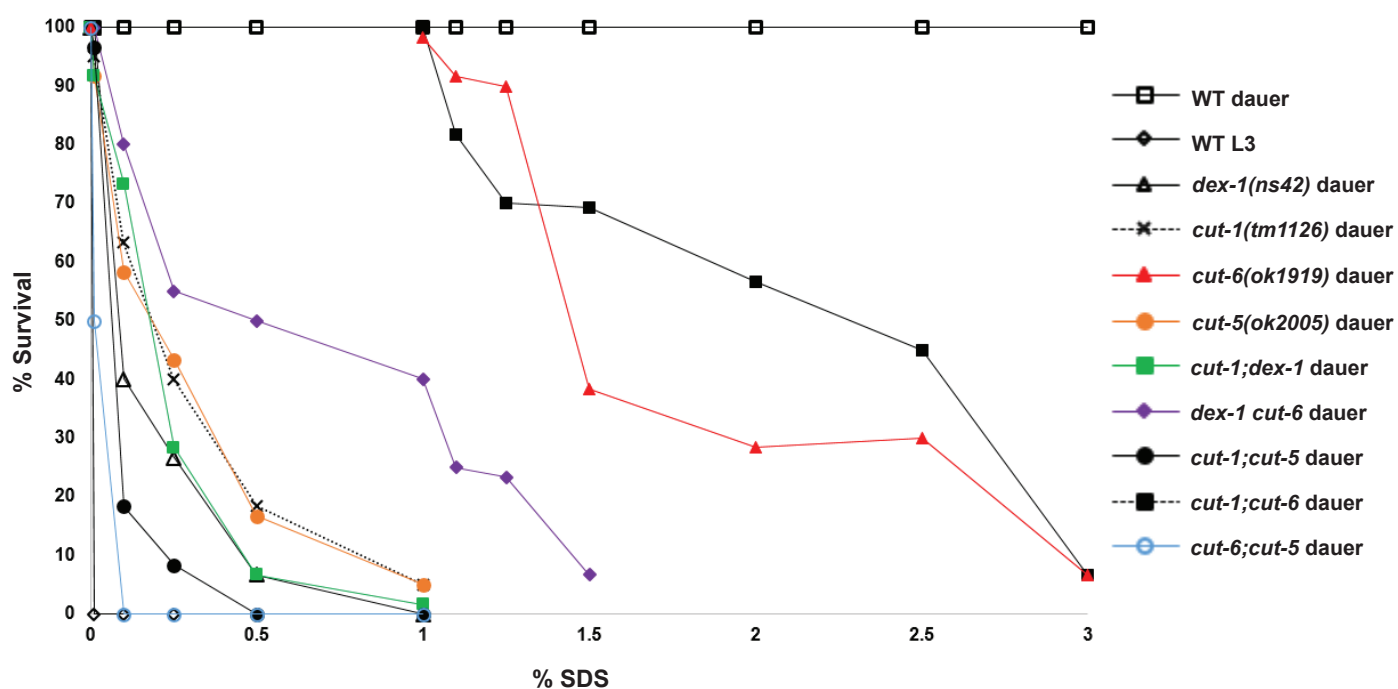

**Figure S6. Dose response curve for wild-type, single- and double-mutant animals.**

Wild-type dauers were resistant to high concentrations of SDS, while non-dauer animals were sensitive to all tested concentrations. *dex-1(ns42)* and CUT mutant dauers showed intermediate SDS sensitivity phenotypes. Double mutants of *dex-1(ns42)* with CUT mutant dauers and double CUT-mutant dauers were also tested at varying concentrations of SDS.
